# Supplementary material
Source: MDPI journal article supplement (https://www.mdpi.com/2297-8739/9/10/308)

**Supplementary Materials**  
**Plant poisons in the garden: A human risk assessment**

Samantha L. Bowerbank, Matteo D. Gallidabino and John R. Dean  
Department of Applied Sciences, Northumbria University, Ellison Building, Newcastle upon Tyne, NE1 8ST

Figure S1. Full scan MS/MS spectrum for a) 5-methoxypsoralen, b) 8-methoxypsoralen and c) compound fragmentation.<sup>68</sup>

Figure S2. Full scan MS/MS for a) aconitine and b) compound fragmentation.<sup>69</sup>

Figure S3. Full scan MS/MS for a) atropine and b) compound fragmentation.<sup>70</sup>

Figure S4. Full scan MS/MS for a) cathinone and b) compound fragmentation.

Figure S5. Full scan MS/MS for a) colchicine and b) compound fragmentation.<sup>71</sup>

Figure S6. Full scan MS/MS for a) coumarin and b) compound fragmentation.<sup>72</sup>

Figure S7. Full scan MS/MS spectrum for a) digitoxin and b) compound fragmentation.

Figure S8. Full scan MS/MS spectrum for a) digoxin and b) compound fragmentation.

Figure S9. Full scan MS/MS spectrum for a) hellebrin and b) compound fragmentation.

Figure S10. Full scan MS/MS spectrum for a) psoralen and b) compound fragmentation.<sup>68</sup>

Figure S11. Full scan MS/MS spectrum for a) scopolamine and b) compound fragmentation.<sup>73</sup>

Figure S12. Full scan MS/MS spectrum for a)  $\alpha$ -solanine and b) compound fragmentation.<sup>74</sup>

Figure S13. Full scan MS/MS spectrum for a)  $\alpha$ -thujone and b) compound fragmentation.

Figure S14. Full scan MS/MS spectrum for a) veratridine and b) compound fragmentation.

Figure S15. Standard extracted ion chromatograms for (a) 5- and 8- methoxypsoralen, (b) aconitine, (c) atropine, (d) cathinone, (e) colchicine, (f) coumarin, (g) digitoxin, (h) digoxin, (i) hellebrin, (j) psoralen, (k) scopolamine, (l) solanine, (m) thujone and (n) veratridine.

Figure S1. Full scan MS/MS spectrum for a) 5-methoxypsoralen, b) 8-methoxypsoralen and c) compound fragmentation.<sup>1</sup>

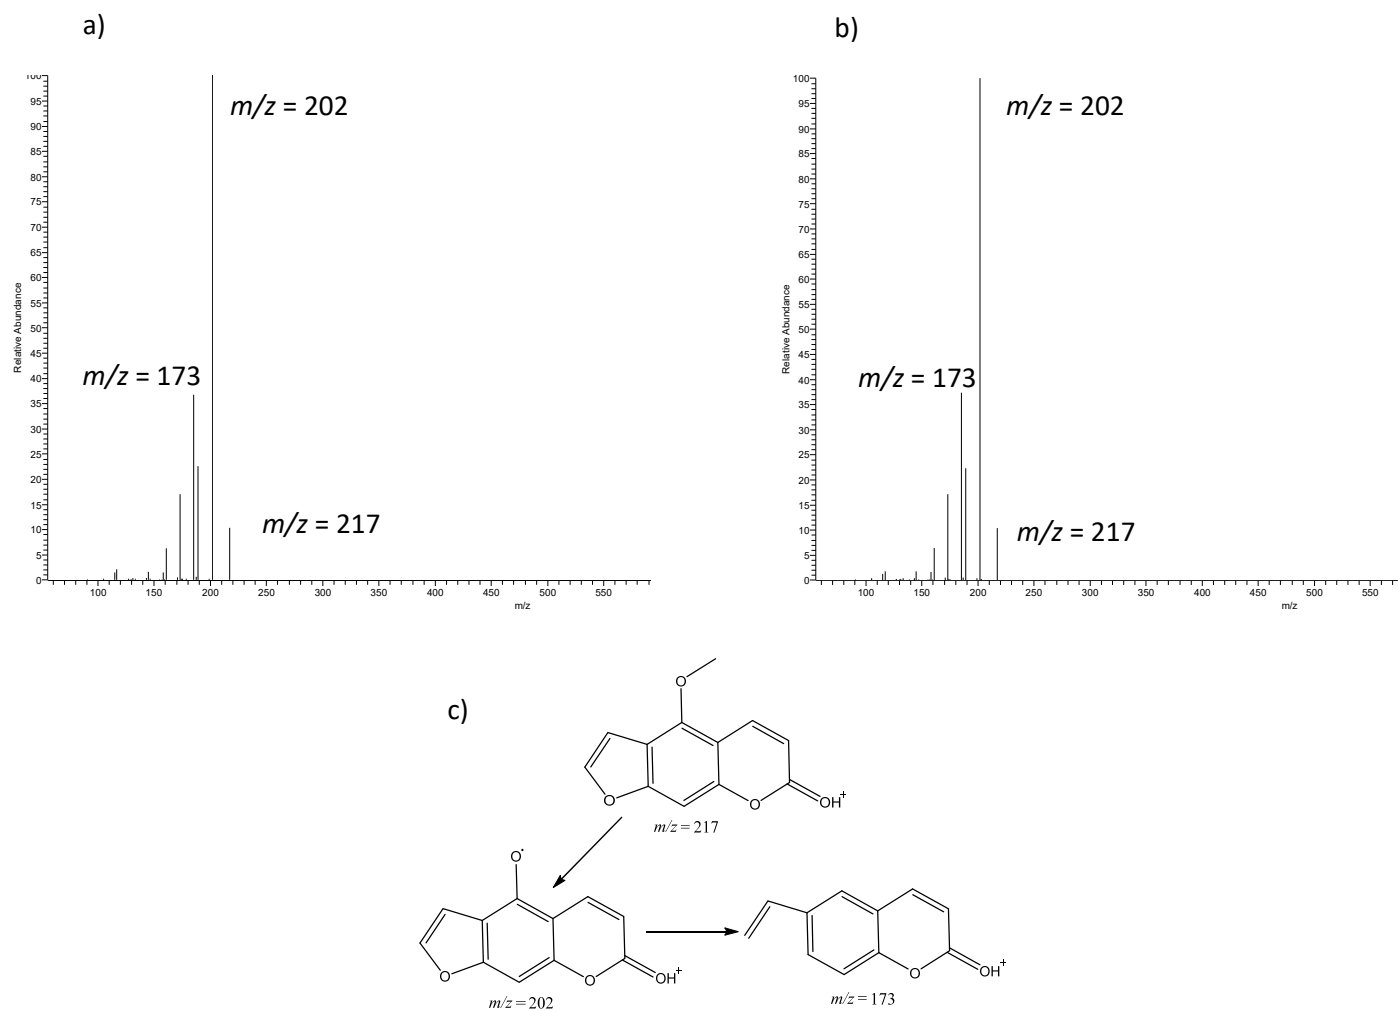

Figure S2. Full scan MS/MS for a) aconitine and b) compound fragmentation.<sup>2</sup>

a)

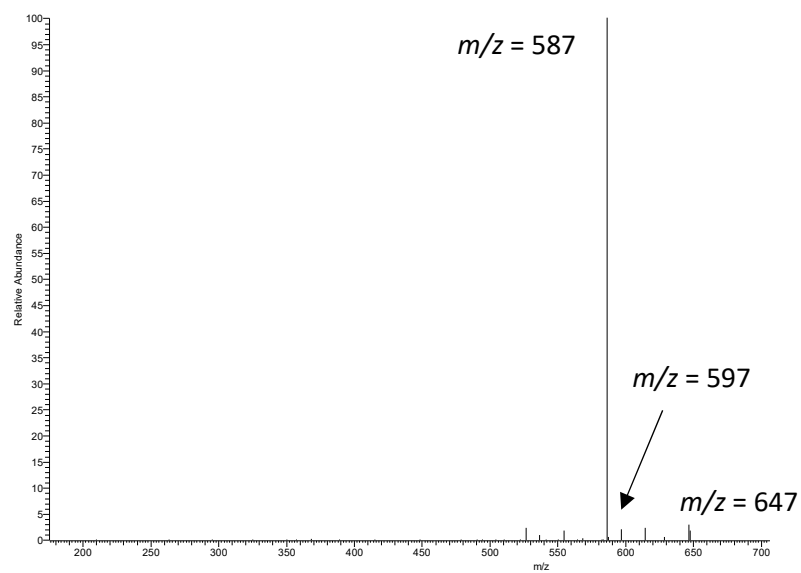

b)

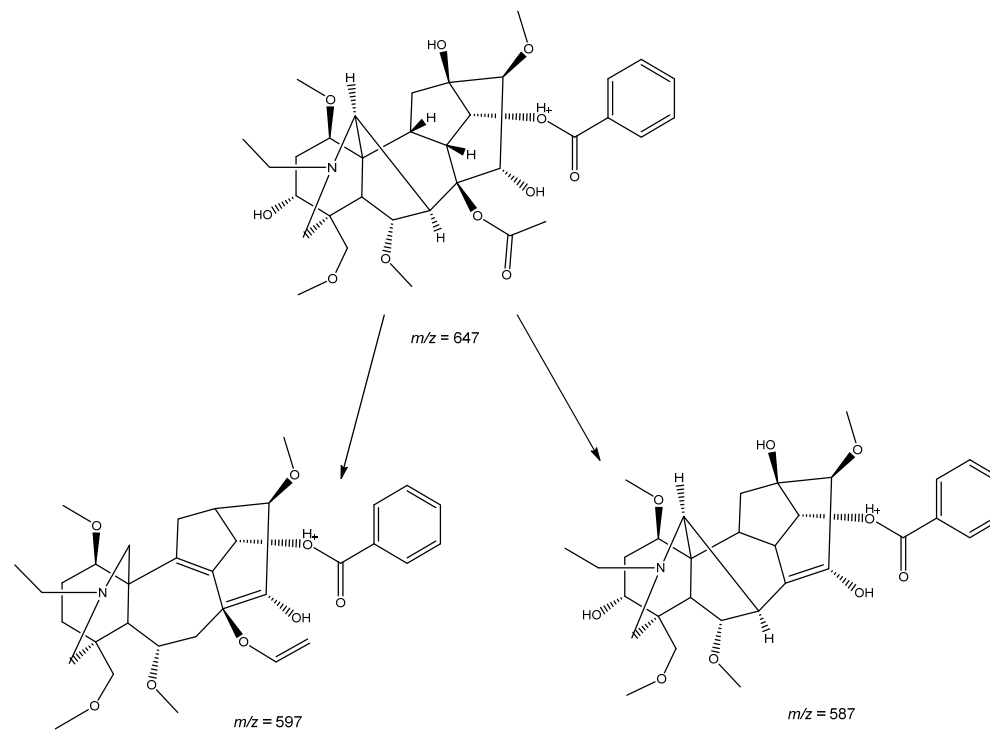

Figure S3. Full scan MS/MS for a) atropine and b) compound fragmentation.<sup>3</sup>

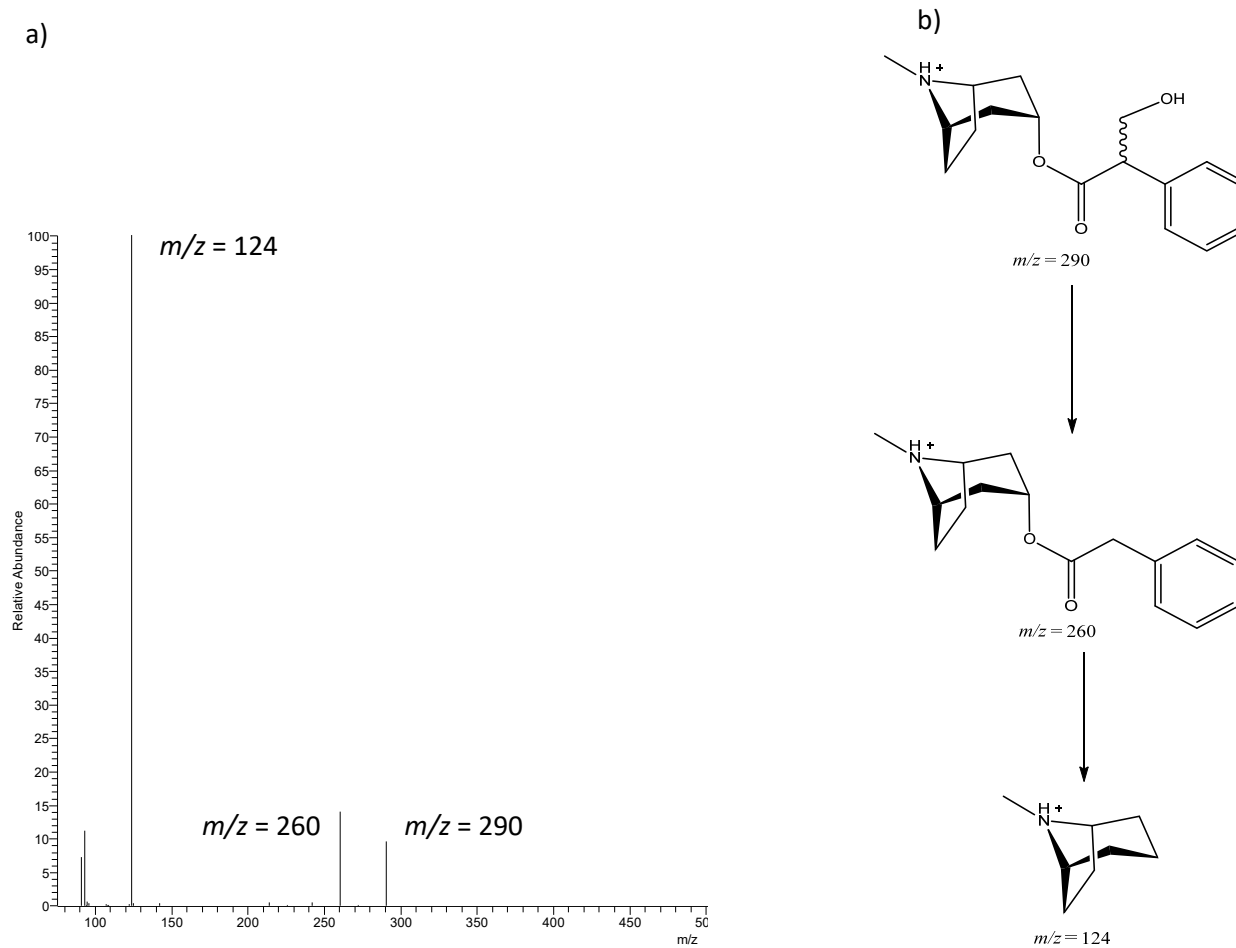

**Figure S4. Full scan MS/MS for a) cathinone and b) compound fragmentation.**

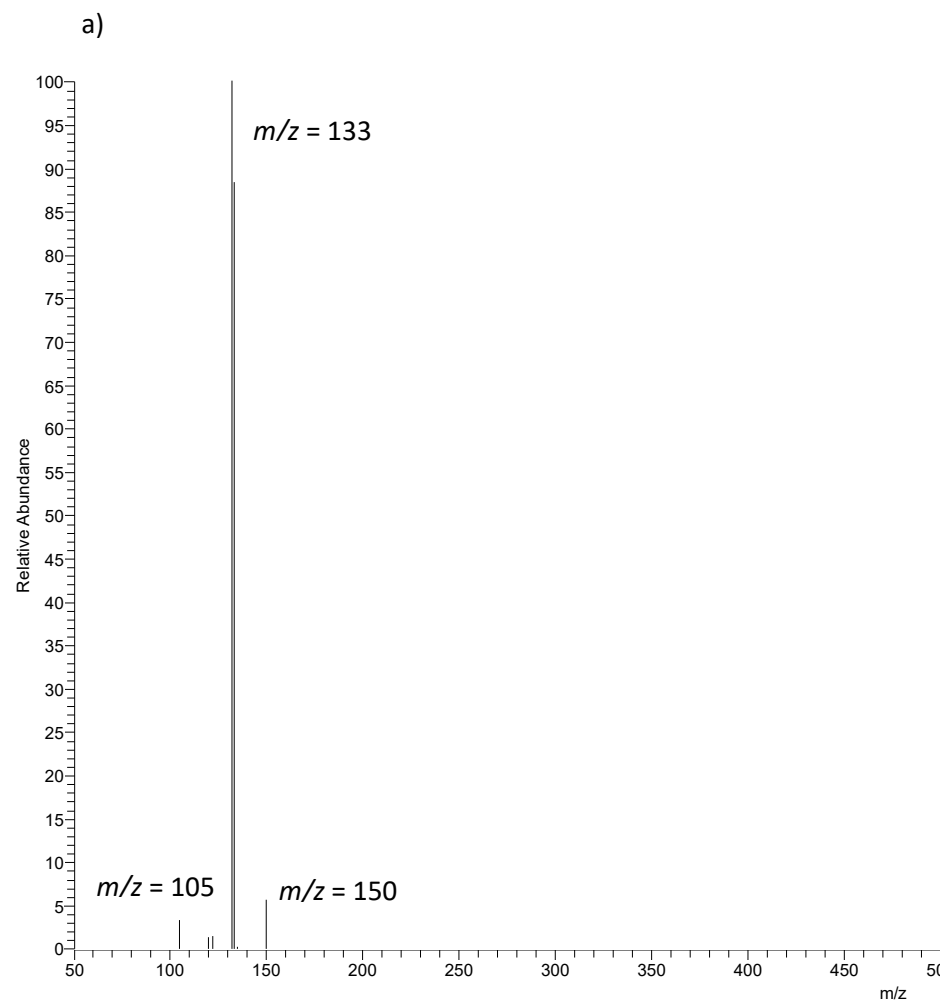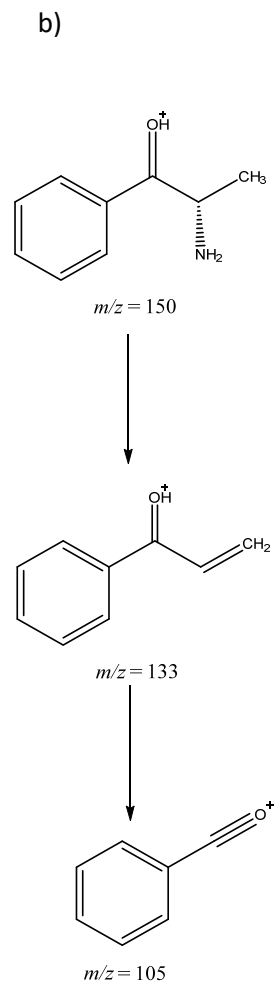

Figure S5. Full scan MS/MS for a) colchicine and b) compound fragmentation.<sup>4</sup>

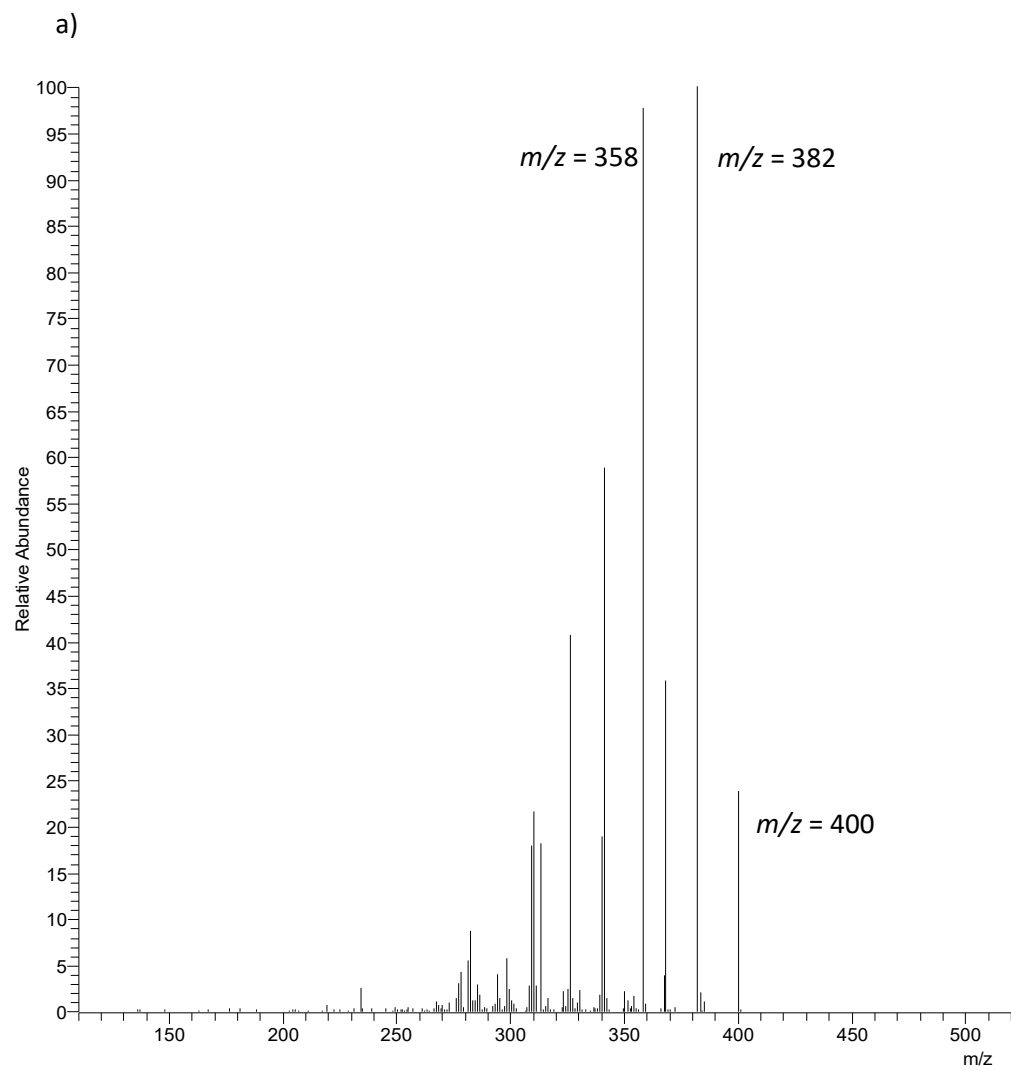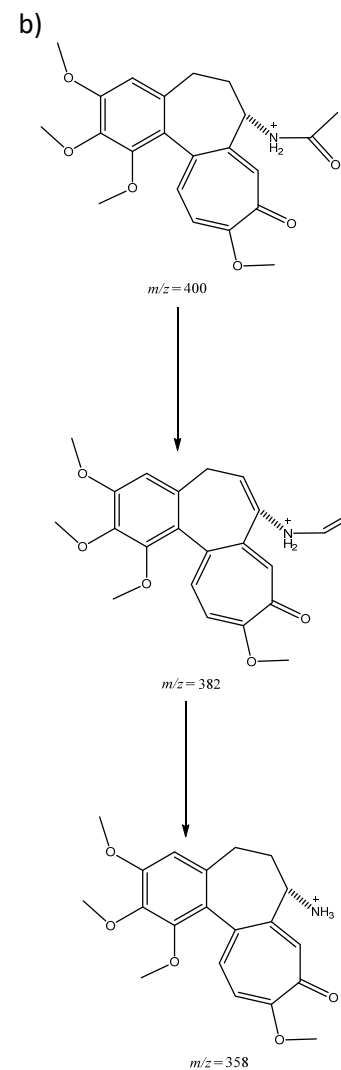

Figure S6. Full scan MS/MS for a) coumarin and b) compound fragmentation.<sup>5</sup>

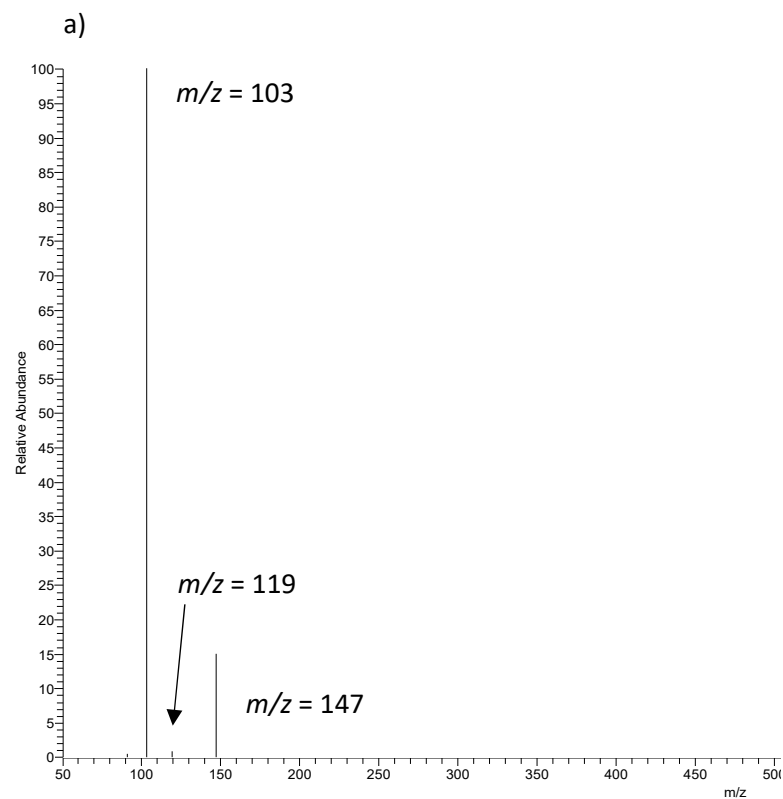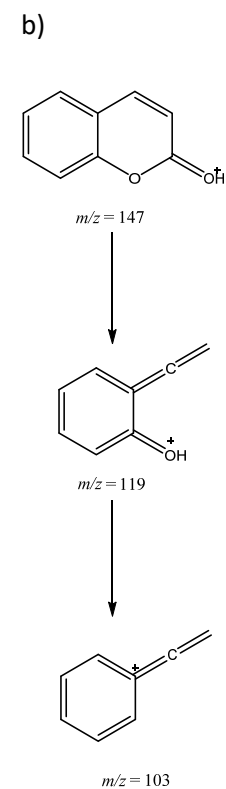

Figure S7. Full scan MS/MS spectrum for a) digitoxin and b) compound fragmentation.

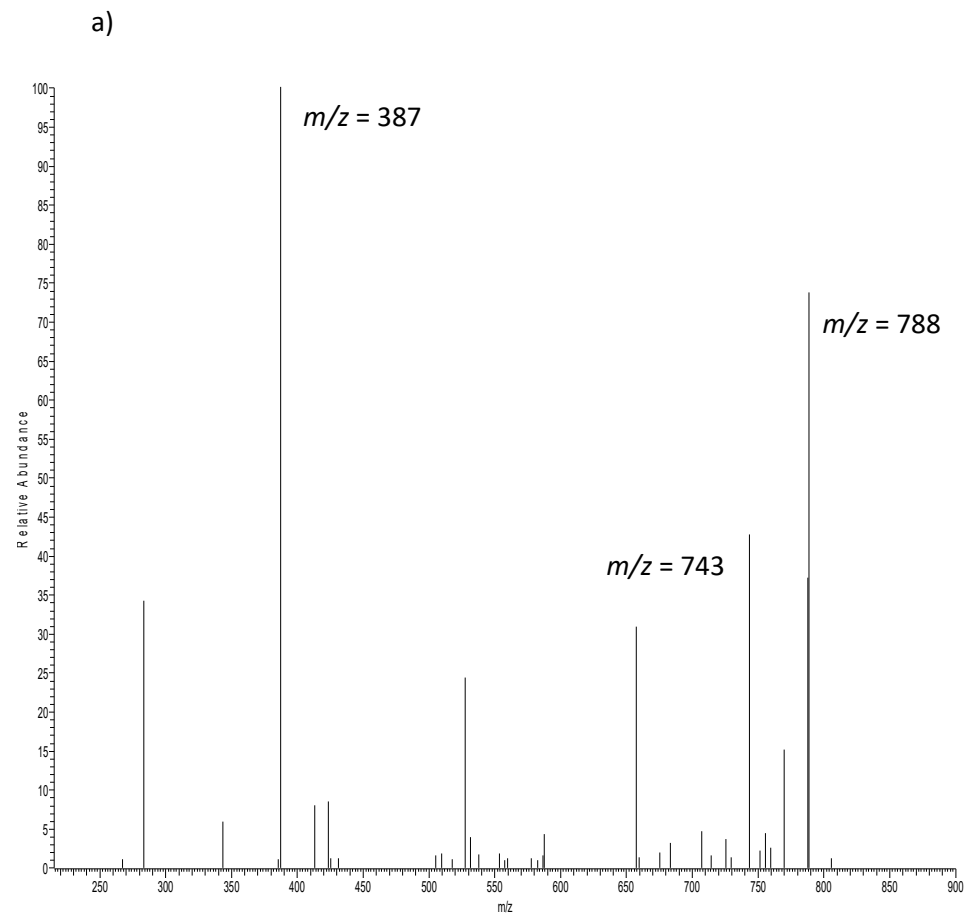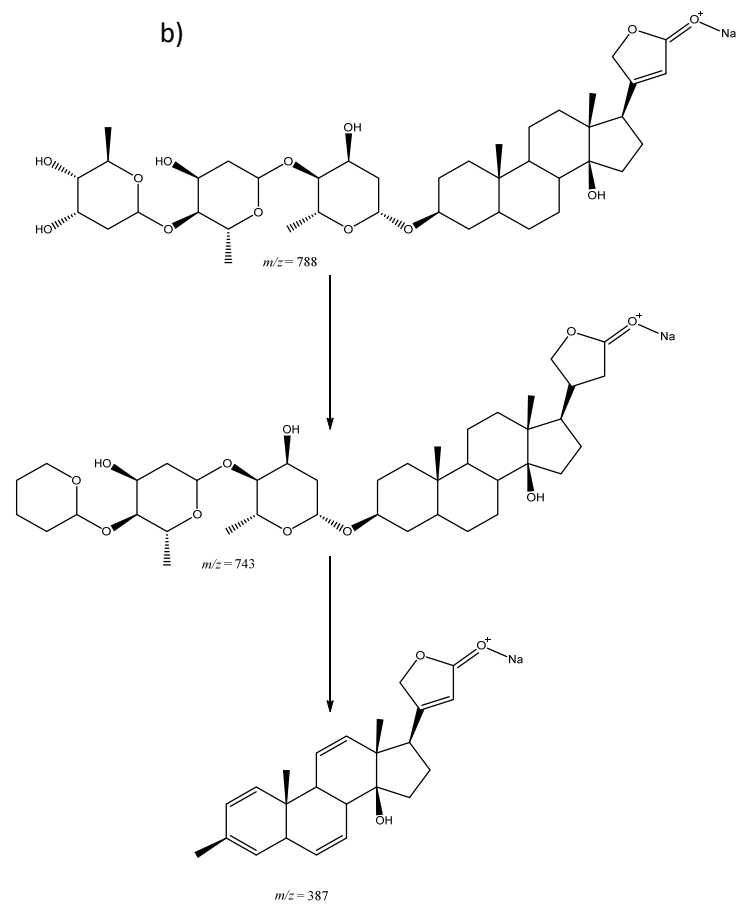



**Figure S8. Full scan MS/MS spectrum for a) digoxin and b) compound fragmentation.**

a)

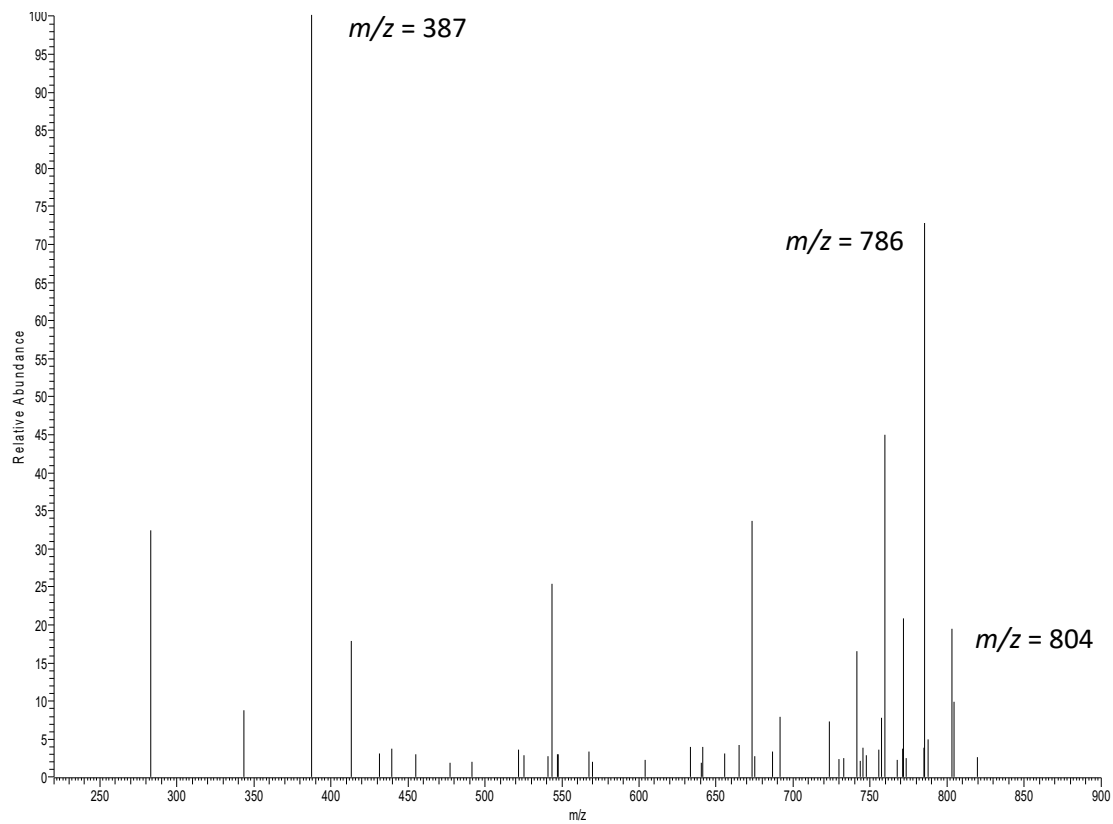

b)

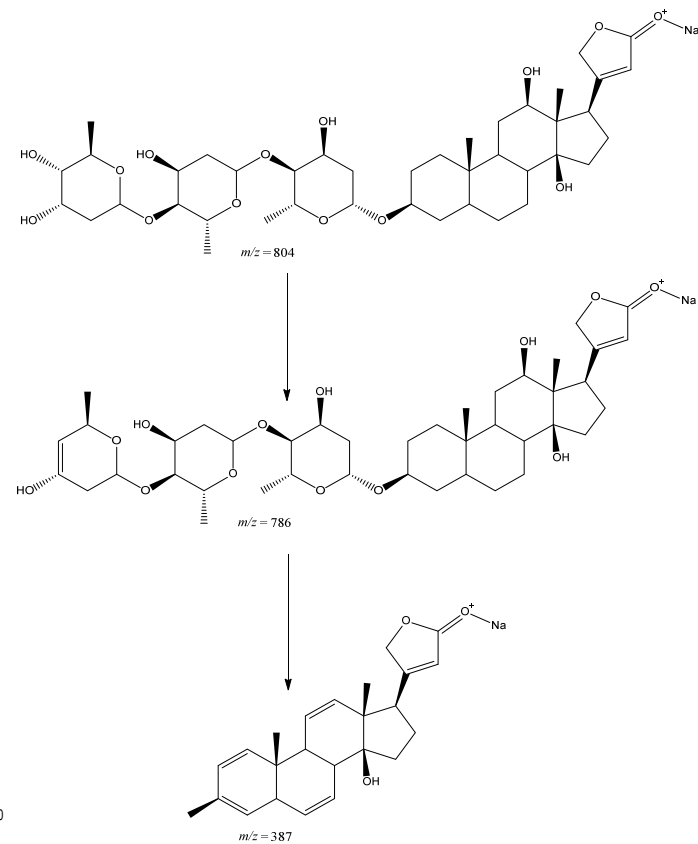

Figure S9. Full scan MS/MS spectrum for a) hellebrin and b) compound fragmentation.

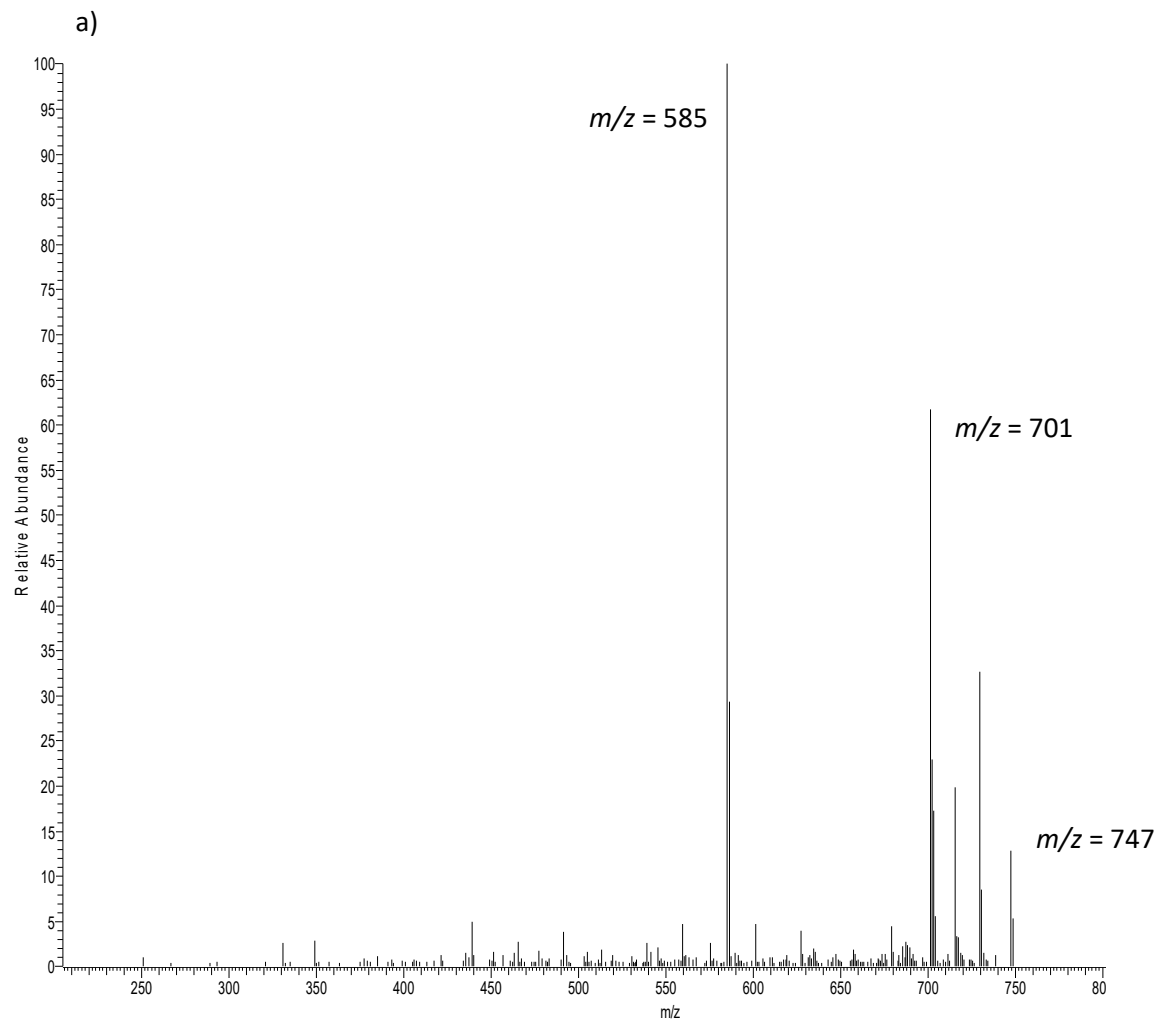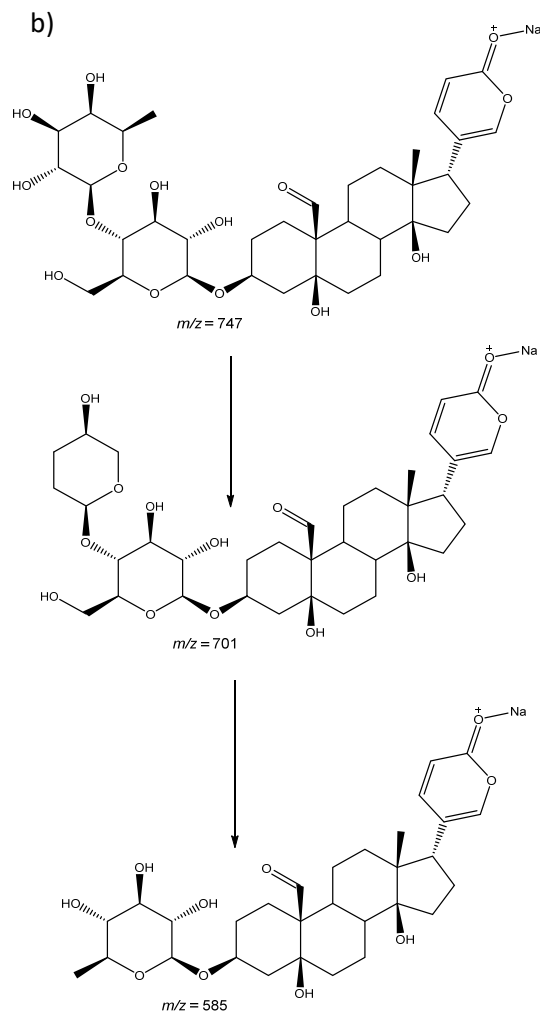

Figure S10. Full scan MS/MS spectrum for a) psoralen and b) compound fragmentation.<sup>1</sup>

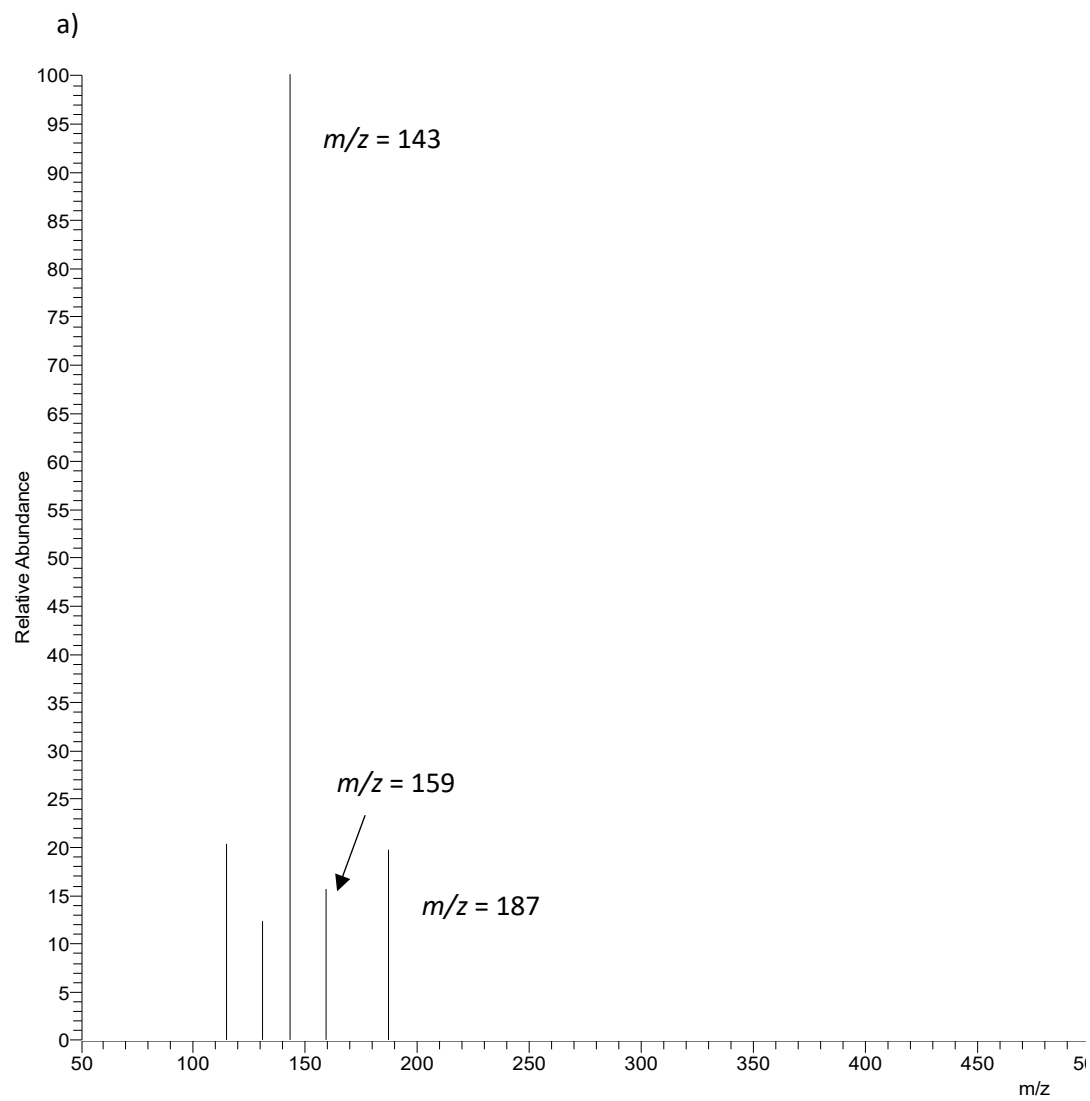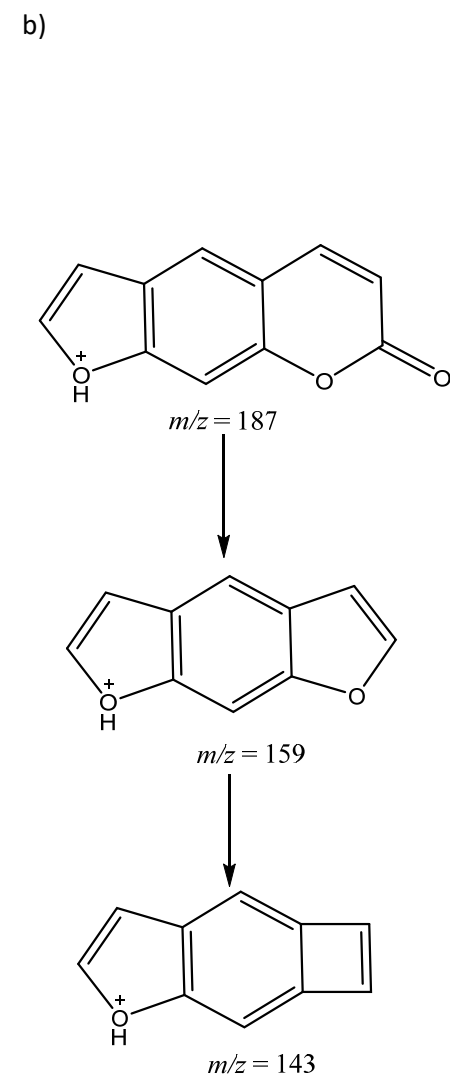

Figure S11. Full scan MS/MS spectrum for a) scopolamine and b) compound fragmentation.<sup>6</sup>

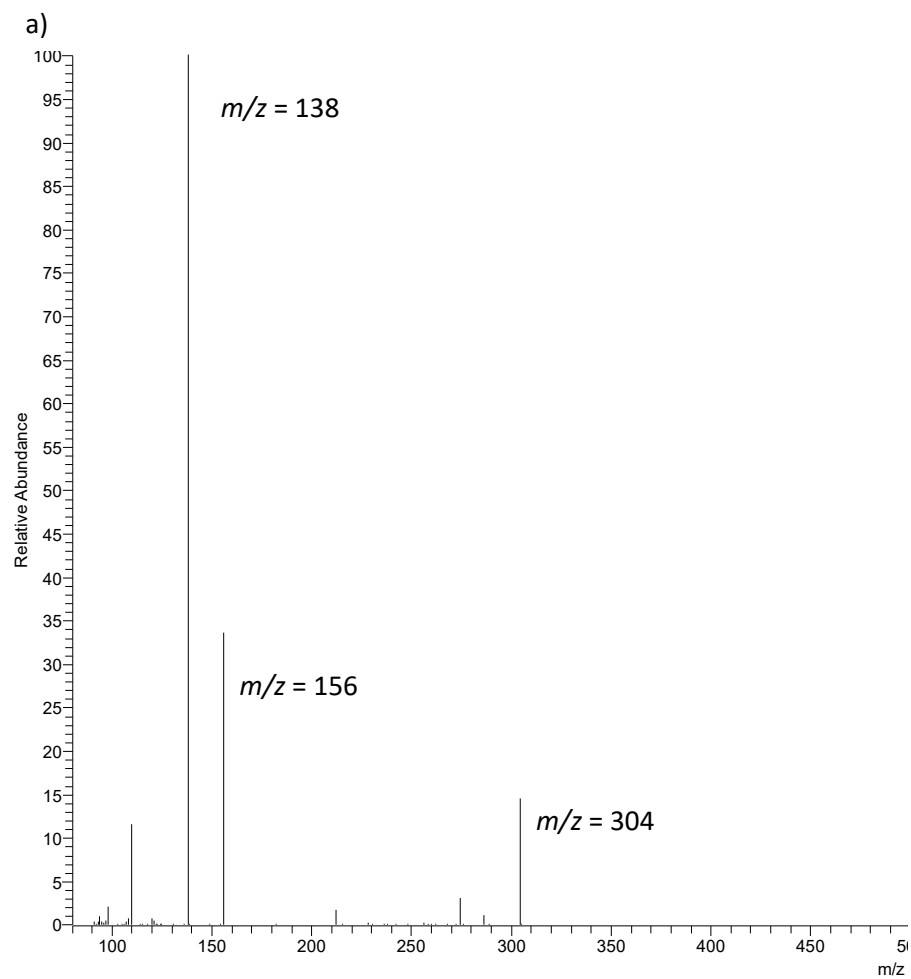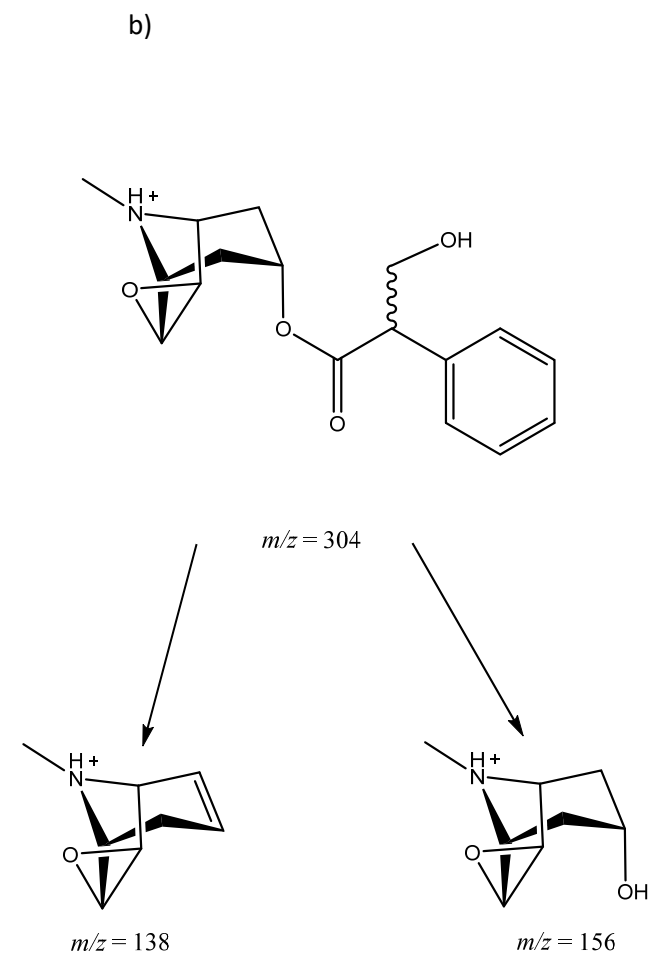

Figure S12. Full scan MS/MS spectrum for a)  $\alpha$ -solanine and b) compound fragmentation.<sup>7</sup>

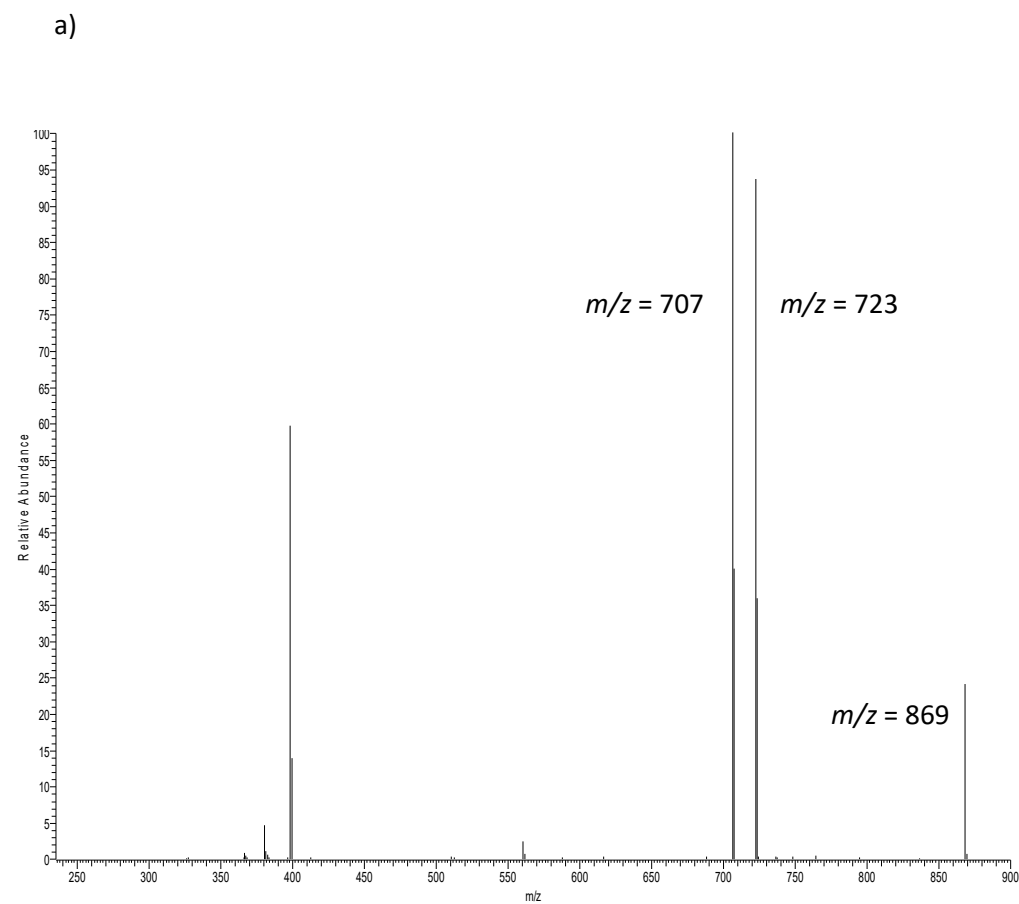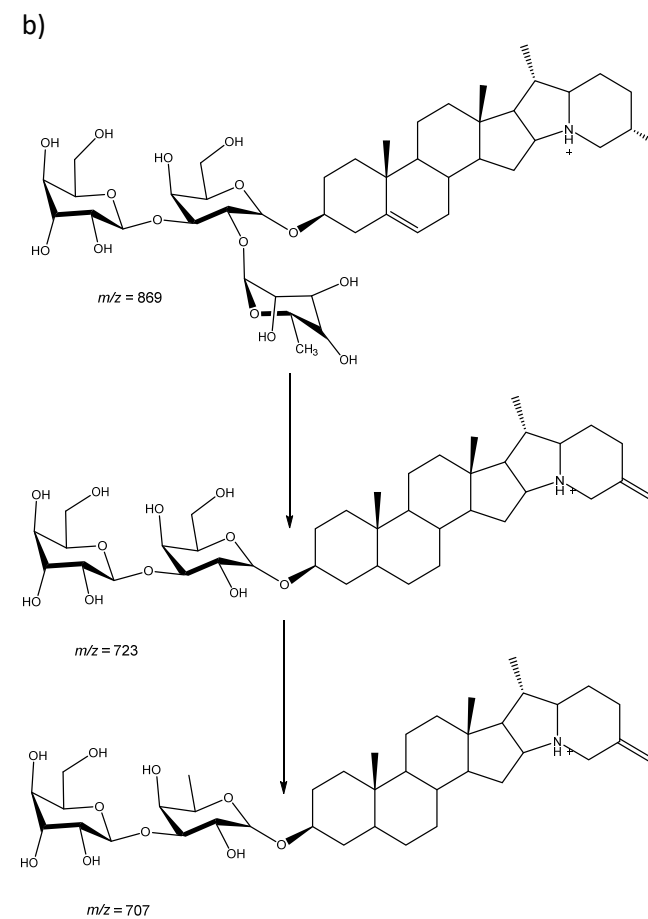

Figure S13. Full scan MS/MS spectrum for a)  $\alpha$ -thujone and b) compound fragmentation.

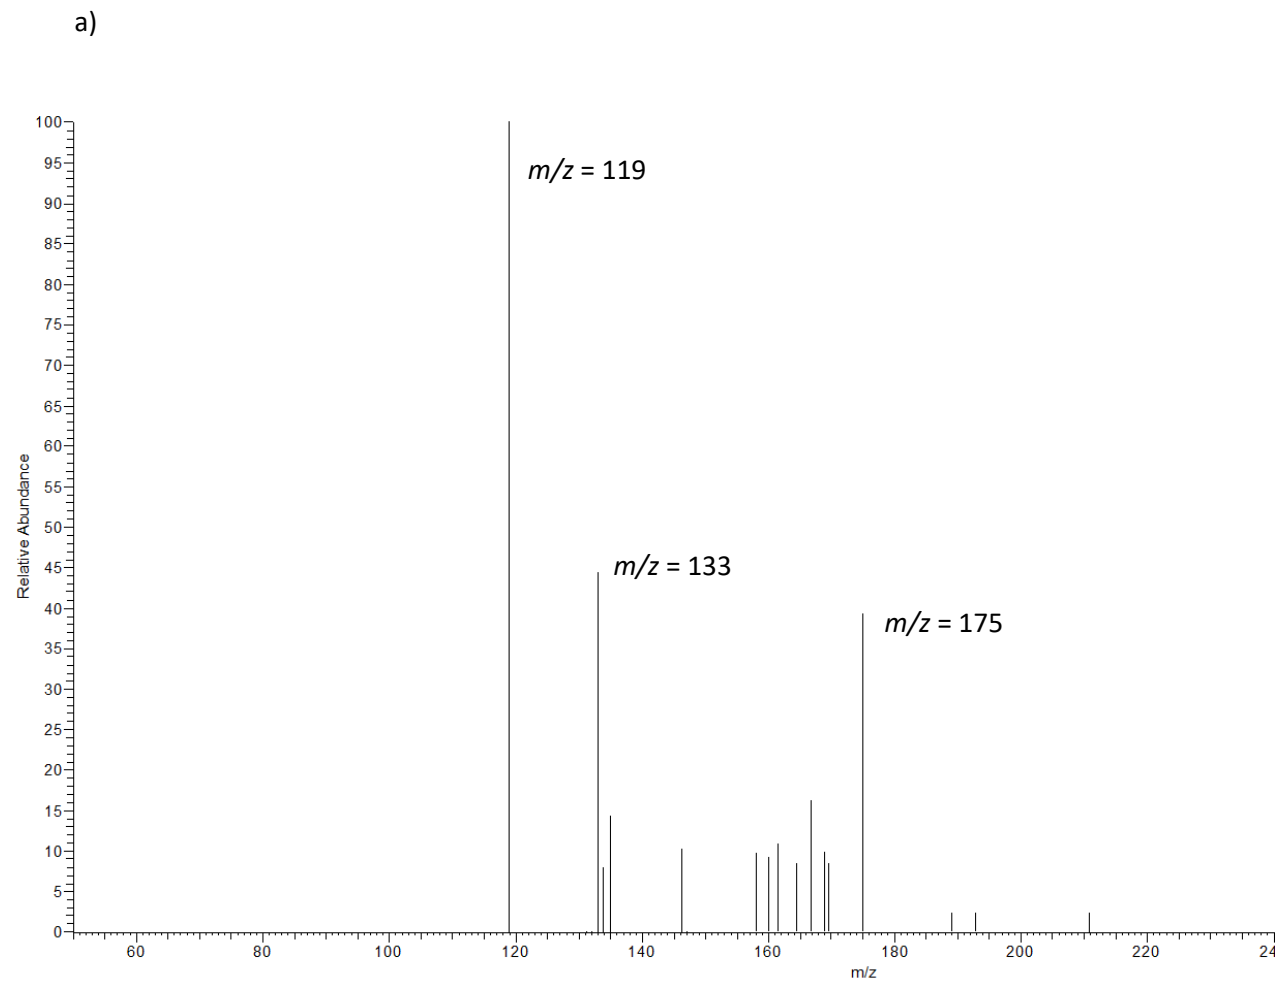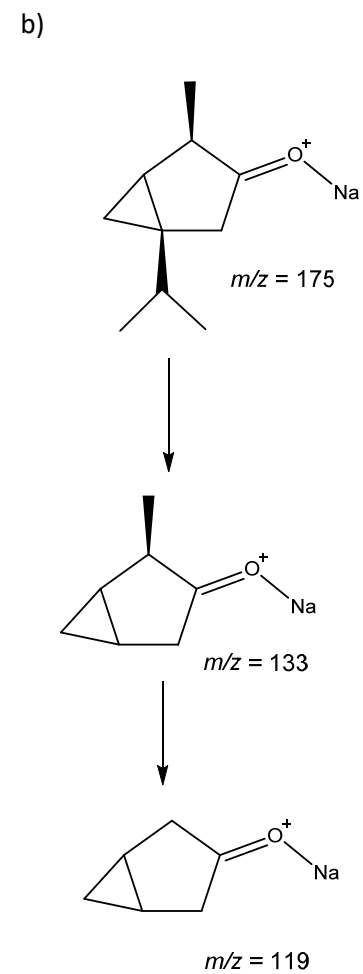

Figure S14. Full scan MS/MS spectrum for a) veratridine and b) compound fragmentation.

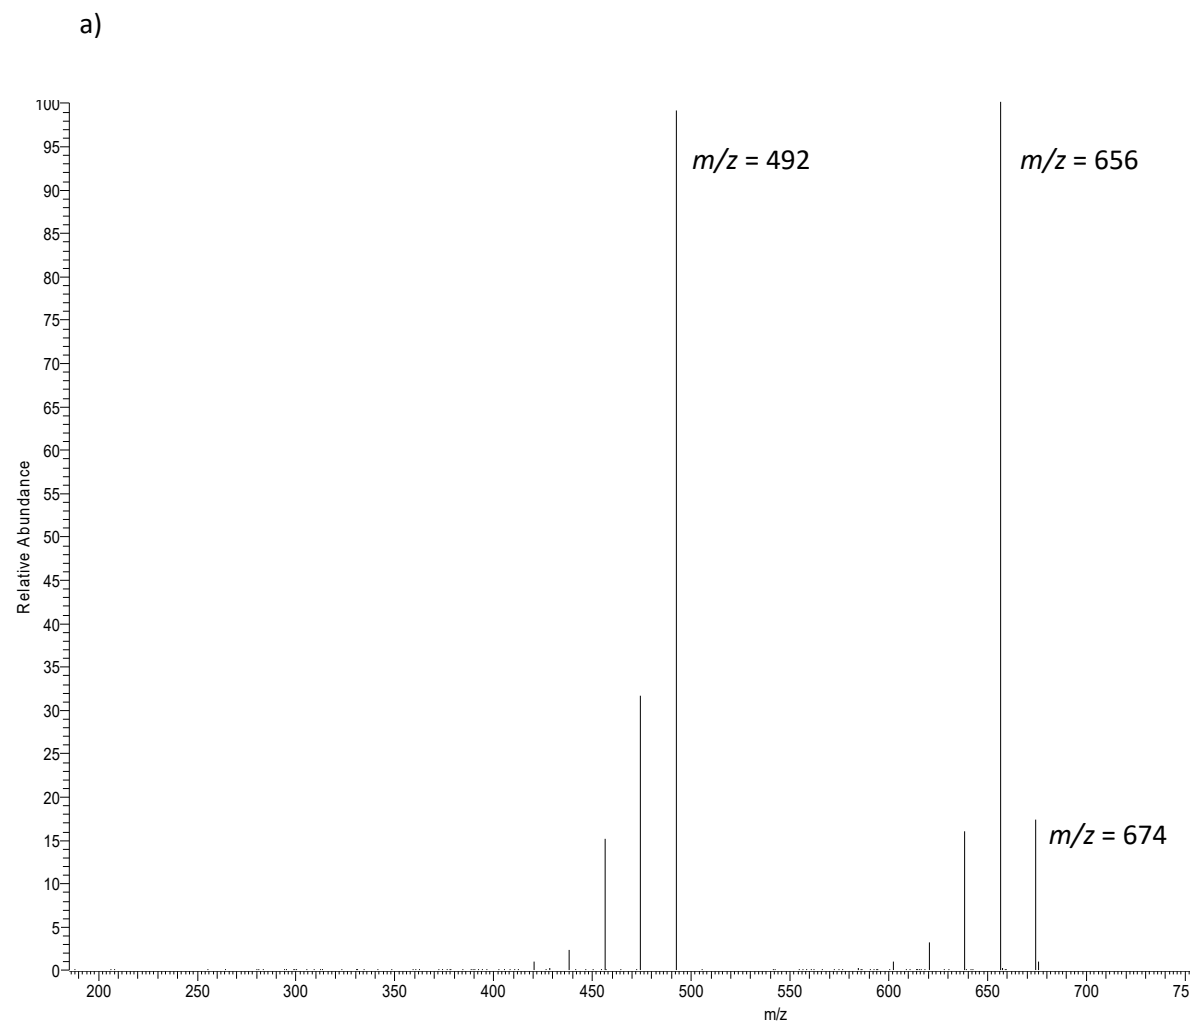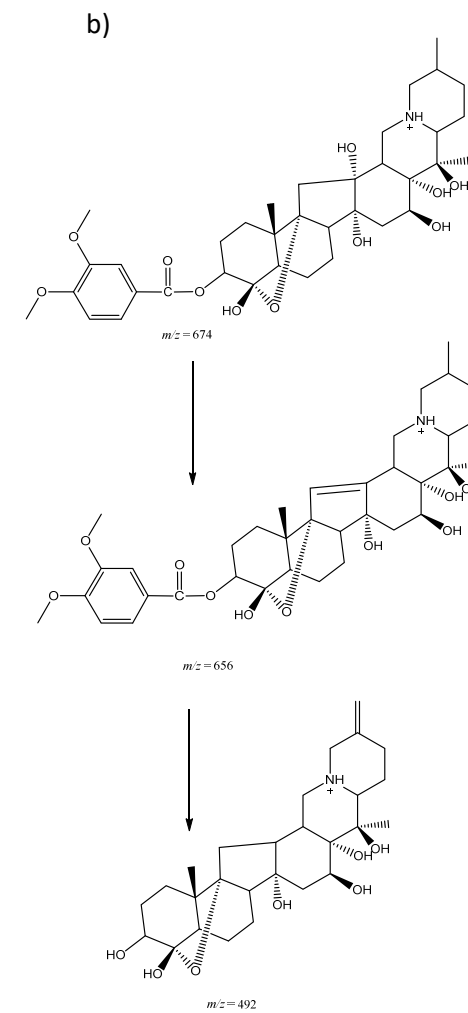

**Figure S15. Standard extracted ion chromatograms for (a) 5- and 8-methoxypsoralen, (b) aconitine, (c) atropine, (d) cathinone, (e) colchicine, (f) coumarin, (g) digitoxin, (h) digoxin, (i) hellebrin, (j) psoralen, (k) scopolamine, (l) solanine, (m) thujone and (n) veratridine**

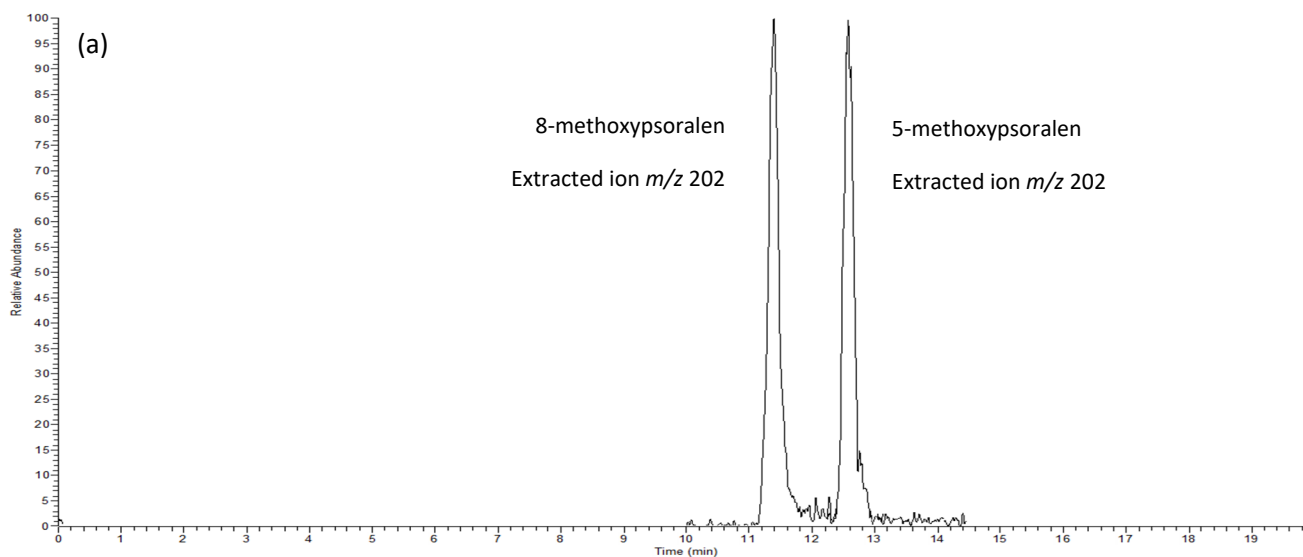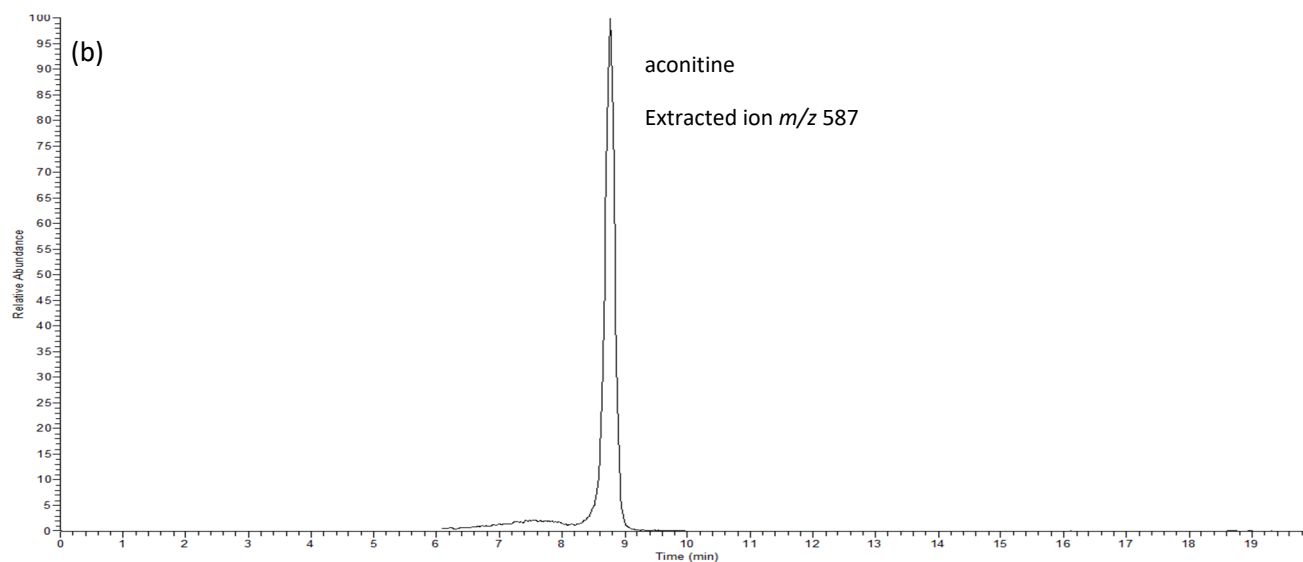



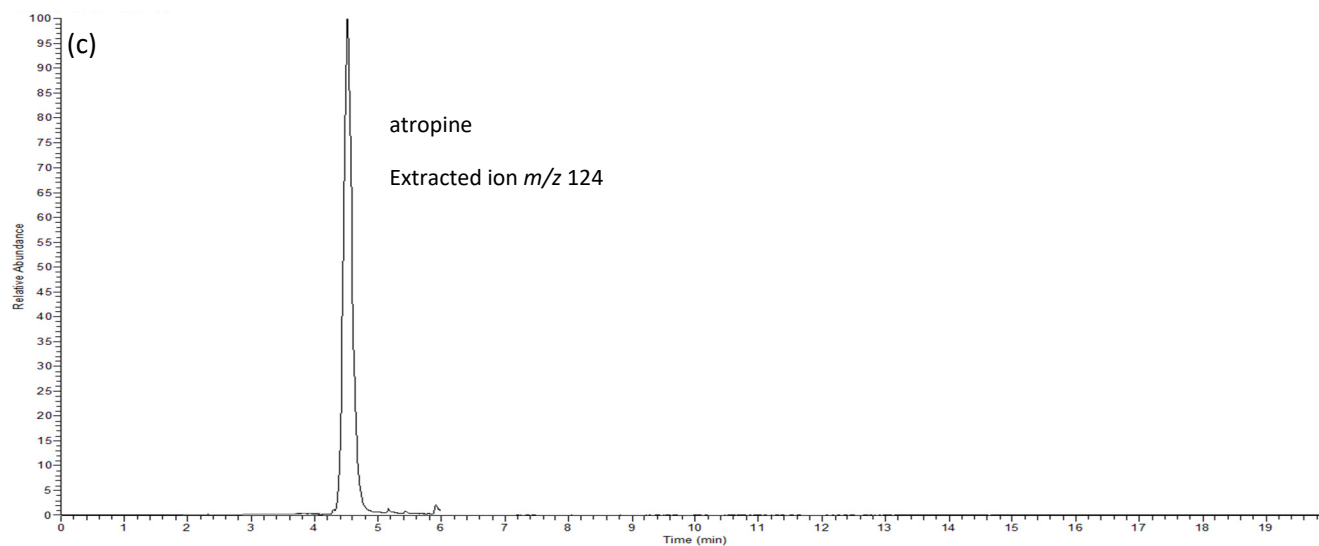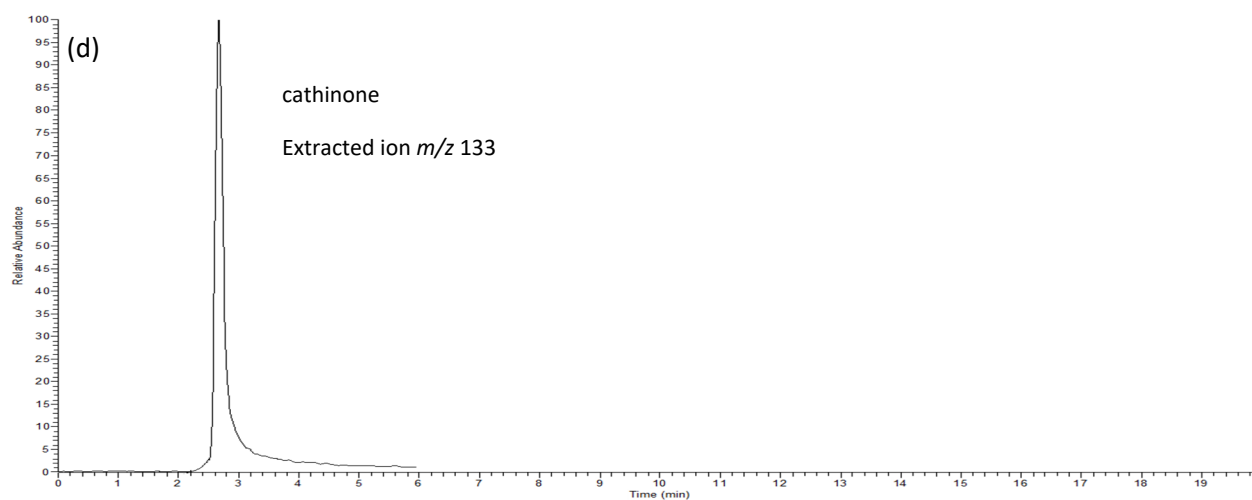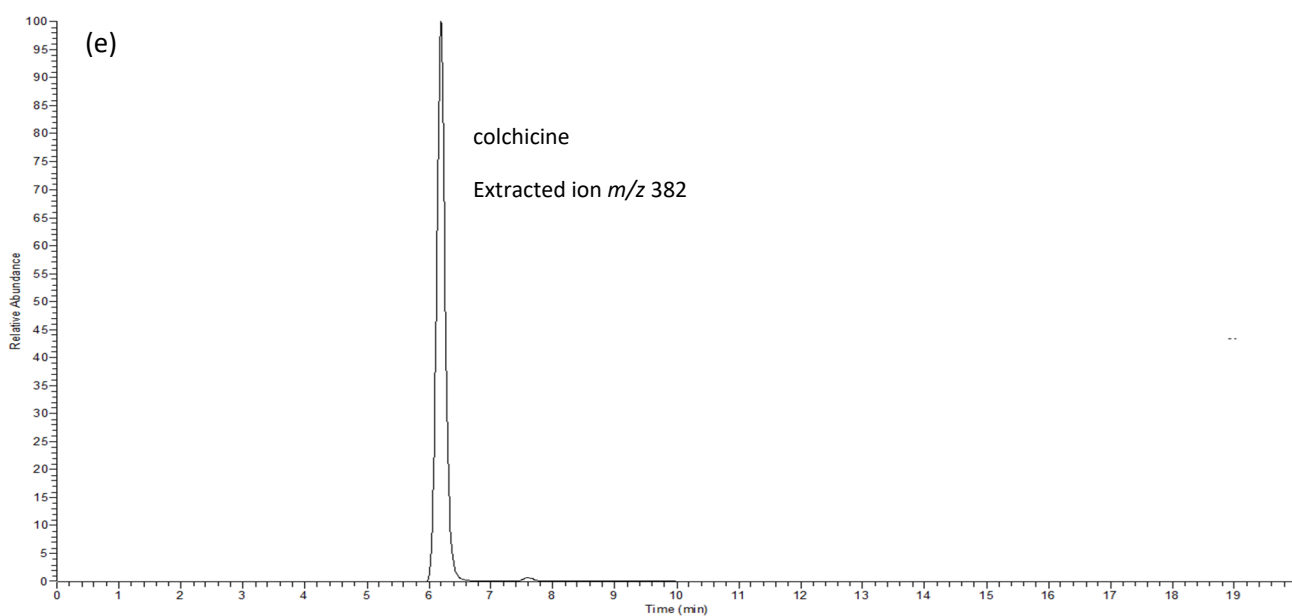

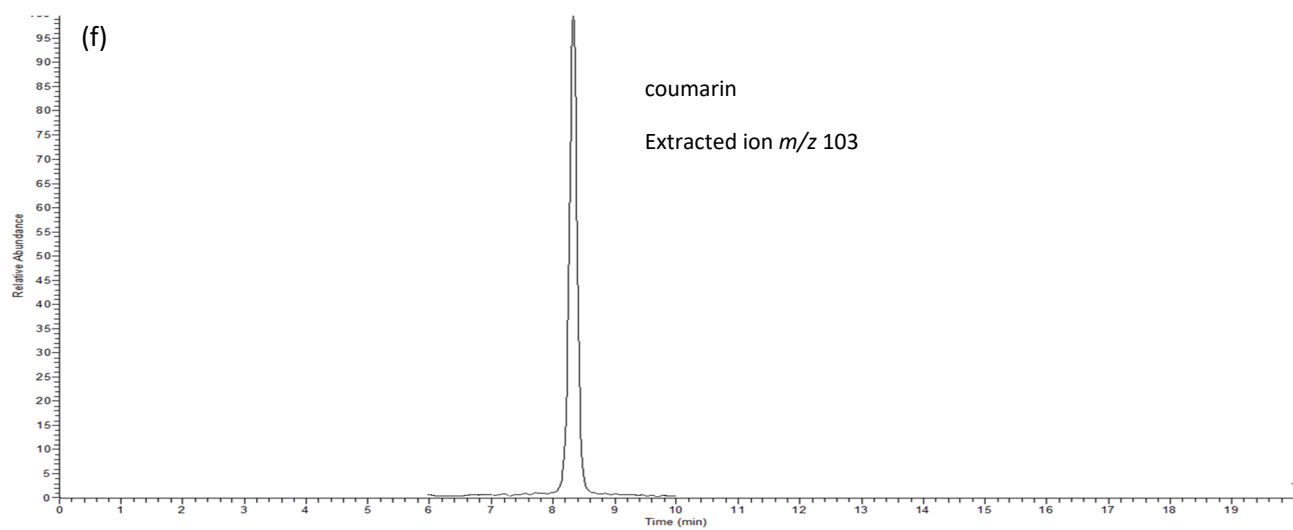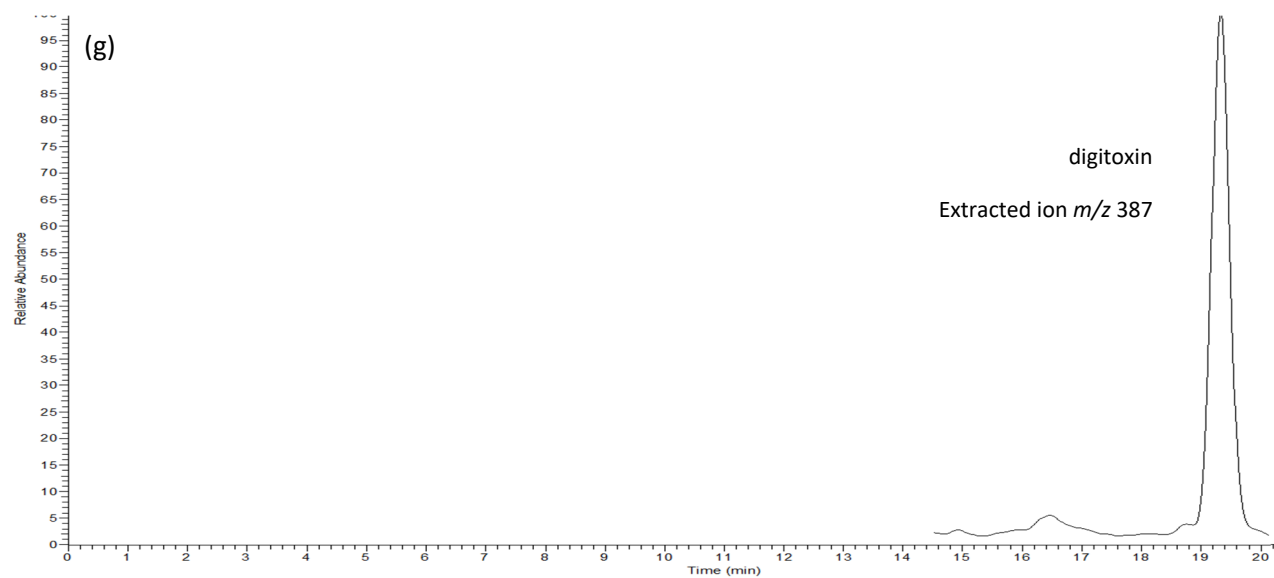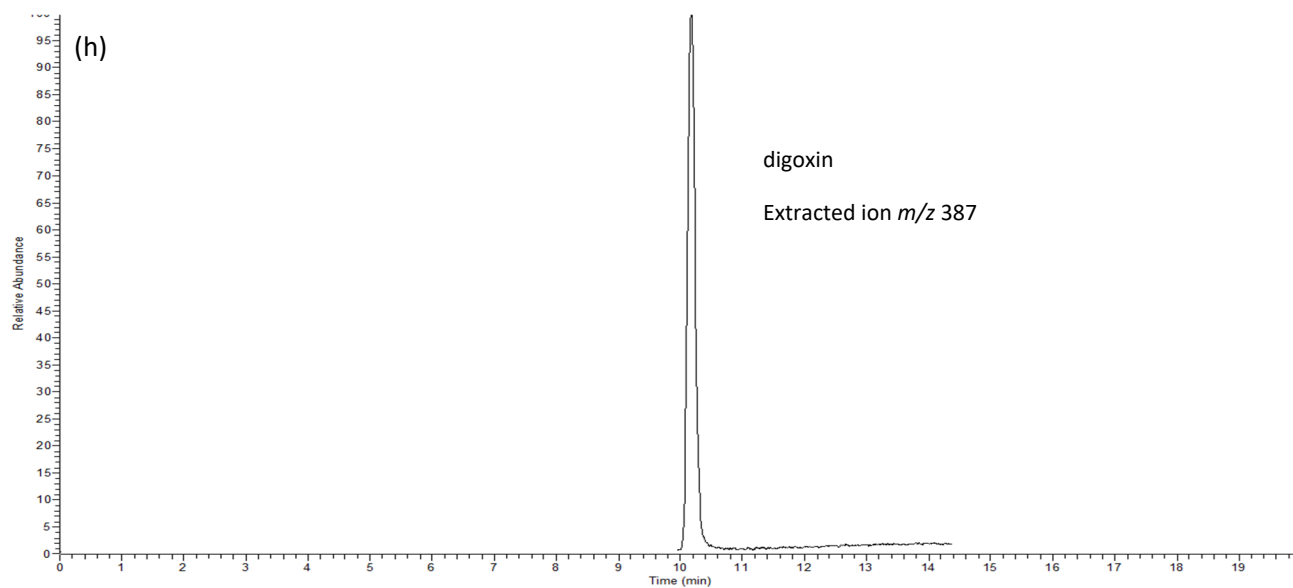

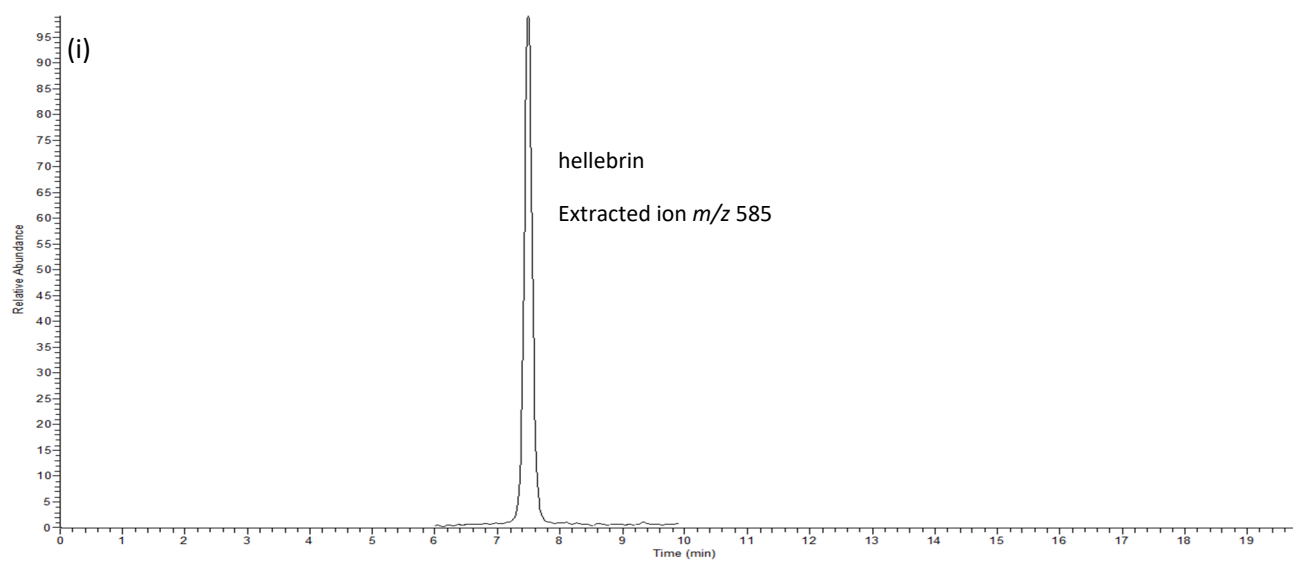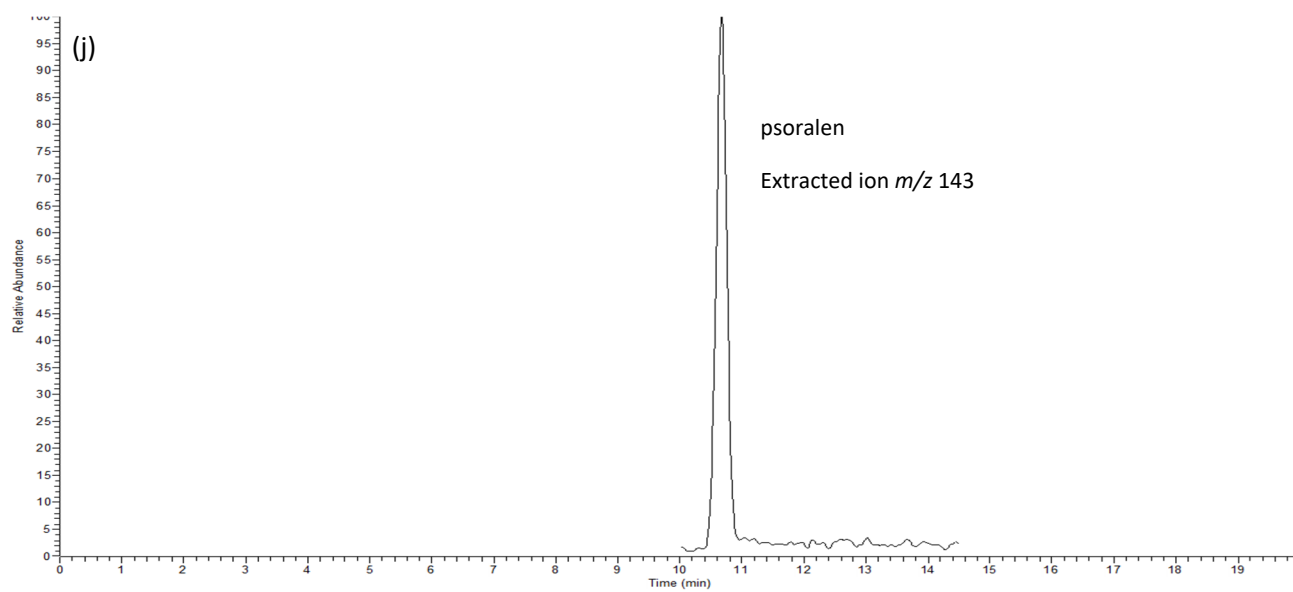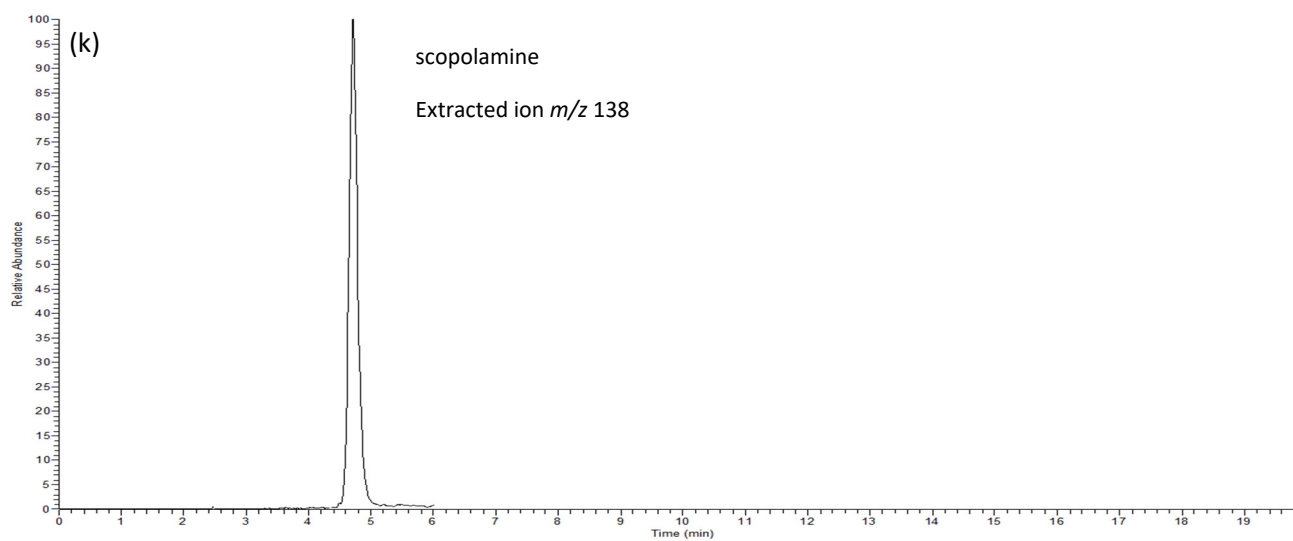

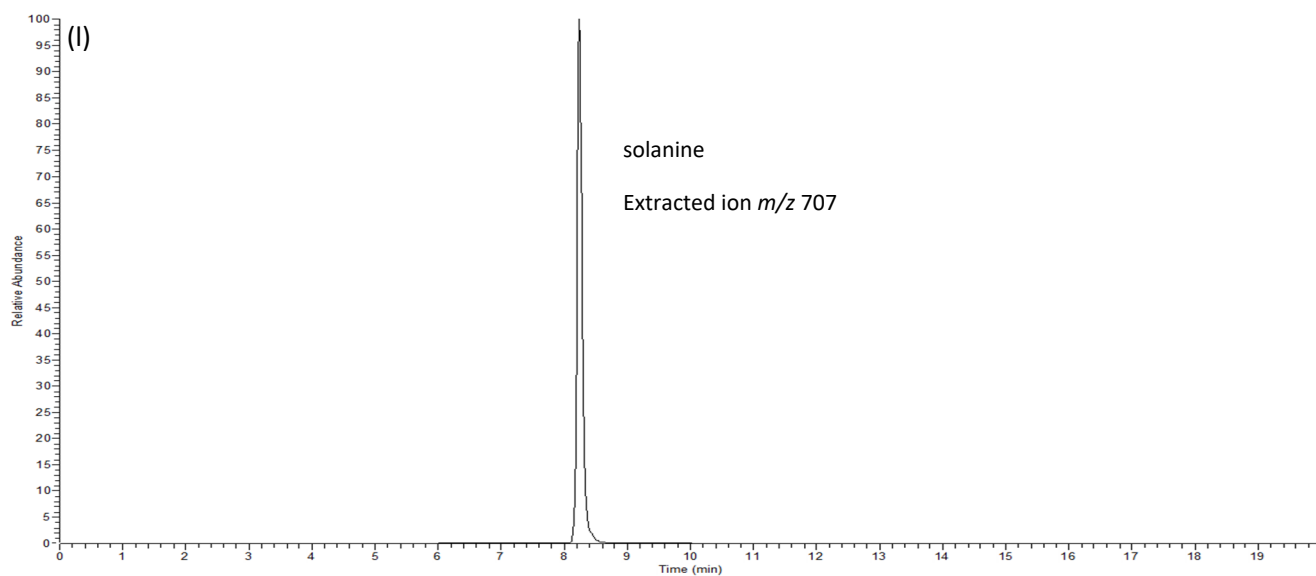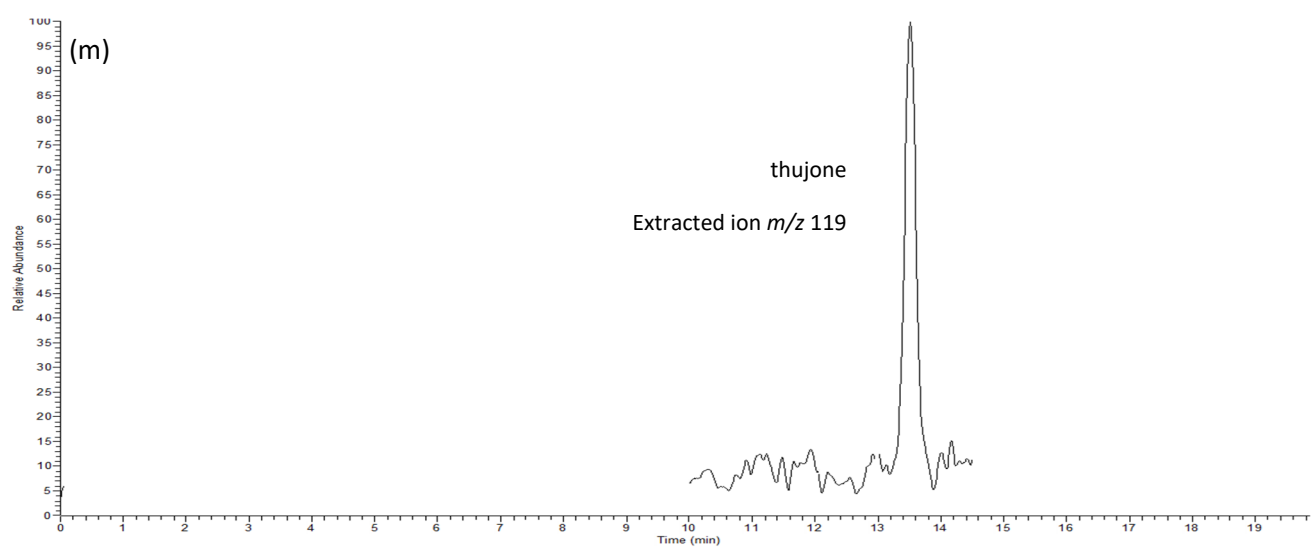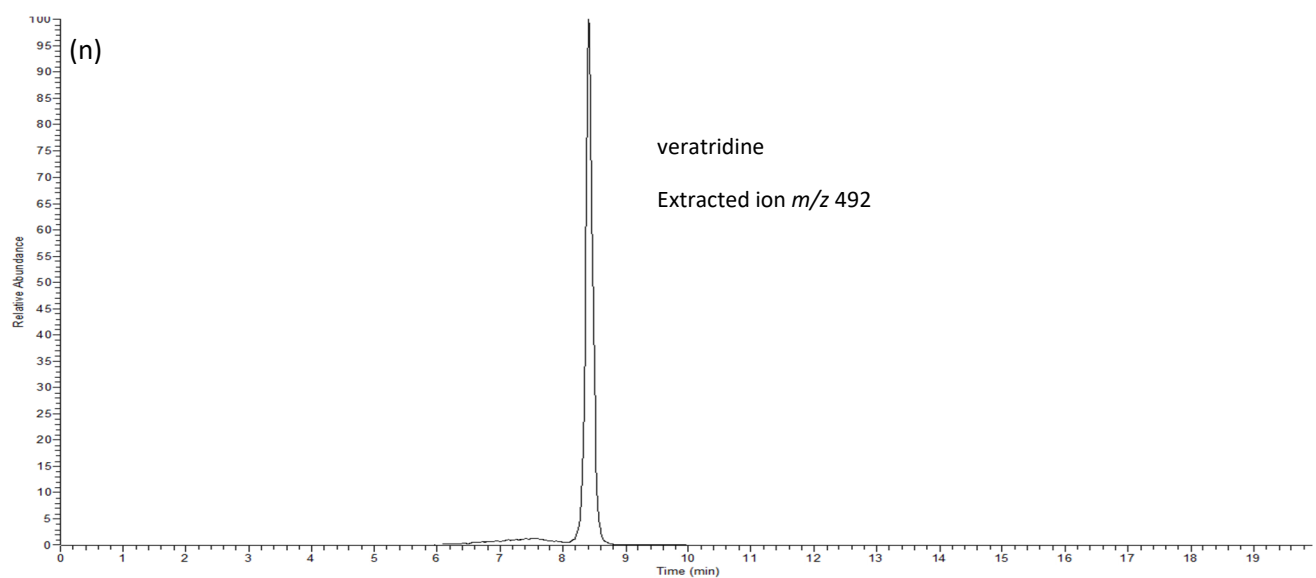

Supplement: s1 [file s1]
